1 **Comparative Multi-scale Hierarchical Structure of the Tail, Plantaris, and Achilles Tendons in**  
2 **the Rat**

3 Andrea H. Lee, Dawn M. Elliott\*

4 Department of Biomedical Engineering, University of Delaware

5 \*Corresponding author. Tel.: +1 302 831 1295. E-mail address: delliot@udel.edu (D.M. Elliott).

6

7 **Keyword:** Tendon, Hierarchical Structure, Multi-scale, Imaging

8

9

10 **Abstract** (500 words)

11 Rodent tendons are widely used to study human pathology, such as tendinopathy and  
12 repair, and to address fundamental physiological questions about development, growth, and  
13 remodeling. However, how the gross morphology and the multi-scale hierarchical structure of  
14 rat tendons, such as the tail, plantaris, and Achilles tendons, compare to that of human  
15 tendons are unknown. In addition, there remains disagreement about terminology and  
16 definitions. Specifically, the definition of fascicle and fiber are often dependent on the diameter  
17 size and not their characteristic features, which impairs the ability to compare across species  
18 where the size of the fiber and fascicle might change with animal size and tendon function.  
19 Thus, the objective of the study was to select a single species that is widely used for tendon  
20 research (rat) and tendons with varying mechanical functions (tail, plantaris, Achilles) to  
21 evaluate the hierarchical structure at multiple length scales. This study was designed including,  
22 histology, SEM, and confocal imaging. We confirmed that rat tendons do not contain fascicles,  
23 and thus the fiber is the largest tendon subunit in the rat. In addition, we provided a  
24 structurally-based definition of a fiber as a bundle of collagen fibrils that is surrounded by  
25 elongated cells, and this definition was supported by both histologically processed and  
26 unprocessed tendons. In all rat tendons studied, the fiber diameters were consistently 10-50  
27  $\mu\text{m}$ , and this diameter appears to be conserved across larger species. Specific  
28 recommendations were made for the strengths and limitations of each rat tendon as tendon  
29 research models. Understanding the hierarchical structure of tendon can advance the design  
30 and interpretation of experiments and development of tissue engineered constructs.

31

32

33

## 34 Introduction

35 Rodent tendons are widely used to study human pathology, such as tendinopathy and  
36 repair, and to address fundamental physiological questions about development, growth, and  
37 remodeling. The rat tail tendon is widely used because its structure is relatively simple;  
38 however, rat tail tendon bears low stresses and lacks muscle-tendon junctions.<sup>1,2</sup> The rat  
39 plantaris and Achilles tendons are also popular model systems<sup>3-8</sup> and there is an increasing  
40 interest in the plantaris tendon as it has recently been suggested to contribute to chronic  
41 Achilles tendinopathy.<sup>9-11</sup> However, the gross morphology and the multiscale hierarchical  
42 structure of these rat tendons are not fully understood.

43 Tendon hierarchical structure, spanning multiple length scales, is widely known, yet  
44 there remains disagreement about terminology and definitions, which hinders communication  
45 among scientists and interpretation of experimental results. For example, much of the  
46 literature uses the terms fiber and fiber bundle to generally refer structures made of collagen.  
47 This general usage of “fiber” can cause confusion when studies report fibrils<sup>12</sup> and fascicles<sup>13</sup> as  
48 fibers. It is widely accepted that the fascicle is the largest tendon subunit,<sup>13-15</sup> followed by  
49 smaller subunits called fibers, and each fiber is composed of fibrils. However, the definition of  
50 fascicle and fiber are often dependent on the diameter size and not their characteristic features,  
51 which impairs the ability to compare across species where the size of the fiber and fascicle  
52 might change with animal size. In large animals, the surrounding interfascicular matrix  
53 boundaries are easily visible<sup>16</sup>, yet a similar structure cannot be found in rat tail tendon, despite  
54 the fact that the term ‘fascicle’ is routinely used to describe a rat tail tendon. The *fascicle*  
55 should be defined as a bundle of fibers with distinct interfascicular matrix boundaries that is  
56 populated with round cells.<sup>17,18</sup> Because the fascicle size in larger animals<sup>19</sup> is about the same  
57 size of an entire tendon in a rat, it is unclear if rat tendon has fascicles. We hypothesize that rat  
58 tendons do not have fascicles due to its small size. Precise definition and terminology of these  
59 hierarchical structures are crucial because the structures are directly related to tendon  
60 physiology and mechanical function.

61 Another source of confusion is the definition, or even existence, of the *fiber*. While  
62 some include the fiber as a part of tendon hierarchical structure schematics<sup>14,20,21</sup>, others  
63 exclude it,<sup>13,22</sup> and the terminology of fiber is used inconsistently. Moreover, when fibers are  
64 defined, it is done by diameter size, which may be species-dependent.<sup>19,23</sup> This definition is  
65 problematic, and it is hard to distinguish between a fiber from fascicle because they have a  
66 large and overlapping size ranges.<sup>20,21</sup> An alternative way to define a fiber is based on another  
67 structural component such as cells. Elongated tendon cells reside parallel to the direction of

68 fibrils and a group of cells is aligned and connected by gap junction.<sup>24-26</sup> These cells outline a  
69 bundle of collagen fibrils, and this bundle may be a unit of fiber. This definition is consistent  
70 with the developmental process of tendon, where multiple cells in contact deposit collagen  
71 between cell-cell junctions during early development.<sup>27</sup> This process leads to cells surrounding a  
72 bundle of collagen fibrils at later stages of development<sup>27</sup>, and thus this supports the  
73 hypothesis that cells may define the boundary of a fiber. In this study, we will test our  
74 hypothesis that fiber is defined by surrounding cells.

75 Tendon hierarchical structures may also depend on loading environment. For example,  
76 there are differences between low- and high-stress bearing tendons for multi-scale  
77 mechanics<sup>16,28-30</sup> and composition<sup>31</sup> in equine and bovine tendons. These differences between  
78 tendons with different mechanical functions suggest that their hierarchical organizations may  
79 be different.<sup>19</sup> Thus, we selected the tail, plantaris, and Achilles tendons to represent tendons  
80 with different mechanical functions.

81 The objective of this study was to evaluate the hierarchical structure of rat tendons at  
82 multiple length scales. Because the hierarchical structure is likely to depend on the species and  
83 loading environment, we chose a single species that is widely used for tendon research (rat)  
84 and tendons with varying mechanical functions (tail, plantaris, Achilles). This study was  
85 designed to investigate the gross morphology at the macro-scale and the hierarchical fascicle  
86 and fiber structures at the micro-scale by using multiple imaging methods including, histology,  
87 SEM, and confocal imaging. In addition, we reconstructed a three-dimensional (3D) structure  
88 from confocal imaging stacks. Understanding and properly defining tendon hierarchical  
89 structures are critical in research to advance the design and interpretation of experiments and  
90 development of tissue engineered constructs.

## 91 **Methods**

### 92 1. Sample Preparation

93 All tendons were from 4-7-month-old female Long Evans rats and sacrificed on the day of the  
94 experiment. Rat tail (n=13), plantaris (n=13), and Achilles (n=13) tendons were divided into five  
95 experimental groups, where each group included different imaging technique. Each tendon was  
96 processed for longitudinal PicroSirius Red staining (n=3/tendon type), transverse H&E staining  
97 (n=3/tendon type), longitudinal scanning electron microscope (SEM) (n=3/tendon type),  
98 confocal imaging with second harmonic generation (SHG) signals and cells (n=3/tendon type),  
99 or 3D rendering of confocal image stack (n=1/tendon type).

### 100 2. Gross Morphology

101 Rat tail tendon was dissected following the same protocol from a published study.<sup>32,33</sup>  
102 Plantaris and Achilles tendons were dissected using bone cutting shears, scalpels, and forceps  
103 to dissect the Achilles and plantaris complex about 4 cm in length with the calcaneus attached.  
104 We separated out both plantaris and Achilles from each other by removing excess surrounding  
105 soft tissue. Each tendon was randomly assigned to different imaging groups after the dissection.  
106 An additional Achilles tendon was further dissected using a sharp dissection microscope to  
107 study how Achilles tendon is fused. We separated each sub-tendon to verify that Achilles  
108 tendon is fused tightly. This sample was discarded after taking a reference picture (Fig 1) and  
109 was not used further in the study.

### 110 3. Histology

111 Histological analyses were performed in longitudinal and transverse directions to observe  
112 the hierarchical structure of tendons in both directions. Each tendon was fixed in 4%  
113 paraformaldehyde at room temperature. For the longitudinal histology, all tendons were fixed  
114 overnight. For transverse histology, the tail tendon was fixed for 30 minutes, the plantaris  
115 tendon was fixed for 2 hours, and the Achilles tendon was fixed overnight. The fixed tendons  
116 were then incubated for 30 minutes in a 30% sucrose solution to avoid possible ice damage. To  
117 process as frozen sections, each tendon was mounted on a plastic mold with optimal cutting  
118 temperature compound (OCT) and was flash frozen with an indirect contact with liquid nitrogen.  
119 We used CryoJane Tape Transfer System (Leica Biosystems) to cut 14  $\mu\text{m}$  thickness sections for  
120 the longitudinal sections and 12  $\mu\text{m}$  thickness sections for the transverse sections. We cut the  
121 mid-plane of the tendon, away from both anterior and superior planes. The longitudinal  
122 sections were stained with PicroSirus Red to visualize collagen alignment, and transverse  
123 sections were stained with H&E to visualize general organization. The staining process followed  
124 a standard staining procedure for frozen sections, and the slides were mounted to be visualized  
125 under Axio Imager 2 Pol (Carl Zeiss Inc). Images were acquired at two different magnifications  
126 (20x and 40x).

### 127 4. Scanning Electron Microscopy (SEM)

128 We imaged tendon structure using SEM to visualize the ultrastructure and confirm  
129 histological observations. Tendons used for SEM were processed following the same procedure  
130 as histology sections until staining ( $n=3/\text{tendon}$ ). Using the cryostat, each tendon was cut once  
131 in a longitudinal direction of mid-plane to image the ultrastructure of mid-plane, and the  
132 sample was briefly placed in water to remove the remaining OCT. The section was processed  
133 for SEM using a standard processing technique consisting of fixation with 1% osmium tetroxide  
134 followed by a series of dehydration with ethanol. Each sample was dried using a critical point

135 dryer, mounted on an SEM sample holder using carbon tabs, and coated with platinum (Leica  
136 Biosystems). The samples were visualized with a field emission SEM (Hitachi S-4700).

### 137 5. Confocal Imaging with Second Harmonic Generation (SHG) Signals and Cells

138 To test our hypothesis that cells outline fiber in tendon, we acquired SHG signals for  
139 collagen alignment and fluorescence from cell for cell placement. SHG microscopy is a nonlinear  
140 optical method that can visualize collagen without additional staining or processing.<sup>34–37</sup>  
141 Immediately after the sacrifice and dissection, tendon was incubated in DMEM culture medium  
142 (Dulbecco's Modified Eagle Medium) supplemented with 25 mM HEPES, 1% penicillin, and 1%  
143 streptomycin (ThermoFisher Scientific) for 30 minutes at 37C. Each tendon was stained with 10  
144  $\mu$ M CellTracker Green CMFDA dye (ThermoFisher Scientific) for 45 minutes and washed in the  
145 medium for 30 min at 37C. Each sample was placed in a petri dish to image with a laser-  
146 scanning multi-photon microscope (LSM 780, objective Plan-Apochromat 20x/1.0, Carl Zeiss Inc).  
147 We used Chameleon Vision II Ti:S laser (Coherent Inc.) tuned to 810 nm and an external  
148 detector to collect SHG signals. A cover glass was placed on top of the tendon to prevent it from  
149 floating. The confocal image stacks ( $0.42 \times 0.42 \times 0.67 \mu\text{m pixel}^{-1}$ ) were taken at the mid-  
150 substance of each tendon. The SHG signals of the most superficial (closest to the skin) and deep  
151 layers (furthest from the skin) were separated from the rest of the stack to show the change of  
152 collagen alignment through the depth. To show the cell placement, an optical slice that showed  
153 the strongest cell staining in the deep plane was separated from the confocal stack.

### 154 6. 3D Rendering of Confocal Images

155 To observe collagen alignment and cell placement in 3D, a separate confocal image stack  
156 from above, spanning  $\sim 50 \mu\text{m}$  in the z-direction, was acquired in the same way as the previous  
157 section in methods. The confocal image stacks were rendered by software AMIRA 6.3  
158 (ThermoFisher Scientific). The blood vessels and cells were selected using an automatic  
159 threshold method under segmentation editor. Additional structures that were not captured by  
160 the automatic segmentation were selected manually. The surface of vessels and cells were  
161 rendered, and the volume of the SHG signal of collagen was rendered to show the 3D structure  
162 of tendon. The opacity of collagen was adjusted to show the 3D structure through the depth. A  
163 supplementary video of the 3D structure was created using AMIRA 6.3 animation function.

## 164 **Results**

### 165 Gross Morphology of Plantaris and Achilles Tendons

166 The gross morphology of plantaris (P) and Achilles (Ach) tendon demonstrated its  
167 structural complexities. Plantaris and Achilles tendons are bound together in vivo (Fig 1a). The  
168 plantaris muscle originates on the anterior-lateral side of the Achilles muscle, passes over the

169 calcaneus (Cal), and inserts into the bottom of the foot. Once the calcaneus is cut, the anatomy  
170 of plantaris and Achilles tendons can be easily distinguished from each other. The plantaris  
171 muscle is behind Achilles muscle complex (Fig 1b, dashed yellow line), and the plantaris tendon  
172 is visible above Achilles tendon (solid yellow line). We separated the two tendons by cutting  
173 connective tissue binding the plantaris and Achilles tendons together at the insertion (Fig 1c, d).  
174 Human plantaris tendon has been previously described as a vestigial tissue that is absent for a  
175 large portion of the population.<sup>38-41</sup> However, recent studies identified plantaris tendon in all or  
176 most of cadavers with variable insertion sites.<sup>9,42,43</sup> We observed a single insertion site for the  
177 rat plantaris tendon, unlike human plantaris tendon. The Achilles tendon was further dissected  
178 to observe its gross morphology and verified that the Achilles tendon is a fusion of three  
179 tendons originating from soleus (Sol), lateral gastrocnemius (Lg), and medial gastrocnemius (Mg)  
180 (Fig 1e) muscles, similar to human.<sup>44,45</sup> The sub-tendons from these muscles are tightly fused  
181 approximately at the half of the tendon length and cannot be further separated without  
182 directly cutting the tendon (Fig 1f). Among the three muscle groups, the Sol tendon is the most  
183 anterior sub-tendon, and Mg tendon is the most posterior sub-tendon. Schematics of the  
184 posterior (Fig 1g) and anterior (Fig 1h) views show the complex 3D morphological structure of  
185 Achilles tendon.

#### 186 Histological Evaluation of Tendon Micro-scale structure

187 To investigate the hierarchical structure and cell morphology in rat tendons, we  
188 conducted several analyses using multiple imaging methods. In longitudinal sections stained  
189 with PicroSirus Red, we observed a separation between structures with a diameter of 10-50  $\mu\text{m}$ ,  
190 at both low (Fig 2a-c) and high magnifications (Fig 2d-f) for all three tendons. The hierarchical  
191 structure defined by this unit of separation, highlighted in white arrows, is likely to be a fiber.  
192 Supporting this notion, we also observed the structures with a similar diameter in longitudinal  
193 view of SEM in all of the tendons, highlighted in green (Fig 2g-i). In addition, the transverse  
194 sections stained with H&E also had separations with a similar diameter at low (Fig 3a-c) and  
195 high magnifications (Fig 3d-f), outlined in blue. Rat tail tendon did not have a similar pattern of  
196 separation between the subunits as seen in plantaris and Achilles tendons in the transverse  
197 direction, perhaps due to its small overall size. Nonetheless, the distance between cells of tail  
198 tendon (blue arrows, Fig 3d) was similar to the separation observed in plantaris and Achilles  
199 tendons (blue outlines, Fig 3e,f).

#### 200 SHG Evaluation of Fiber Structure and Cell Morphology

201 The collagen structure and cell morphology were visualized using the confocal  
202 microscope to confirm histological findings without the potential fixation and histological

203 artifacts. At the deep plane (away from the surface of the tendon) all tendons had aligned  
204 collagen (Fig 4a-c). At the superficial plane (the surface of tendon) tail tendon had no change in  
205 collagen alignment from deep planes (Fig 4d), while both plantaris and Achilles tendons had an  
206 additional layer of peritenon, a complex meshwork of collagen that was about 20  $\mu\text{m}$  thick (Fig  
207 4e, f). In deep planes, the cells with elongated morphology aligned along collagen bundles  
208 (white arrows) that were the same diameter as observed histology (Fig 2, 3). Thus, rat tendon  
209 has a single hierarchical structure with a diameter of 10-50  $\mu\text{m}$  that is surrounded by the  
210 elongated cell, and we define them as fiber from here and on (Fig 4g-i).

### 211 Three-dimensional (3D) Evaluation of Tendon

212 The confocal image stacks were reconstructed to view the 3D tendon structure (Fig 5).  
213 The 3D reconstruction confirms that cells, shaded in green, surround the collagen bundles (grey)  
214 that match the size of the fiber that was identified by histology (Fig 2, 3). For the tail tendon, we  
215 again observed no peritenon (Fig 5a), but we observed peritenon for the plantaris and Achilles  
216 tendons. The peritenon was populated with blood vessels and localized cells with different  
217 morphology than the elongated cells between fibers, shaded in red (Fig 5b, c). In the transverse  
218 direction, the 3D structure of tendon shows that cells surround the fiber, highlighted with  
219 yellow arrows (Fig 5d-f). Similarly, the cells surround the fiber in an oblique view, highlighted  
220 with yellow arrows (Fig 5g-i). Again, we observed no additional boundary. The video of the 3D  
221 reconstruction is included as a supplemental video (S.M 1-3). Thus, the 3D rendering of tendon  
222 confirms that the definition of a fiber is a bundle of collagen that is outlined by elongated cells,  
223 supported by both histologically processed and unprocessed tendons. In all rat tendons studied,  
224 the fiber diameters were consistently 10-50  $\mu\text{m}$ .

225 There were no additional boundaries that further divided any of the rat tendons, and we  
226 did not observe any evidence of interfascicular matrix, which suggests that there are no  
227 fascicles in the rat tendons. A fascicle is defined by a surrounding interfascicular matrix, which is  
228 populated with round cells.<sup>17,18</sup> A fiber may be the largest subunit in rat tendons, and this  
229 diameter was consistent in transverse and longitudinal histology and SEM.

### 230 **Discussion**

231 In this study, we evaluated the hierarchical structure of rat tendons at multiple length  
232 scales for tendons with varying mechanical functions, including the tail, plantaris, and Achilles  
233 tendons and created tendon-specific schematics based on our observations (Fig 6). Using  
234 multiple imaging methods, we confirmed that rat tendons do not contain fascicles, and thus the  
235 fiber is the largest tendon subunit in the rat. In addition, we provided a structurally-based  
236 definition of a fiber as a bundle of collagen fibrils that is surrounded by elongated cells, and this

237 definition was supported by both histologically processed and unprocessed tendons. In all rat  
238 tendons studied, the fiber diameters were consistently 10-50  $\mu\text{m}$ .

### 239 Structure-based Definitions of the Fascicle and Fiber

240 This study provides a hierarchical schematics of rat tendons that clarify structural-based  
241 definitions of fibers and fascicles (Fig 6). A fascicle is defined by the surrounding interfascicular  
242 matrix, which is populated with round cells<sup>17,18</sup> and is not simply a bundle of fibers. We showed  
243 that there are no fascicles in rat tendons, rather the fiber is the largest subunit. Considering the  
244 size of rat tendon, it is not surprising that the structural complexity is reduced with the scale of  
245 the animal.<sup>15</sup> In large animals, the fascicle and interfascicular matrix are easily identified and  
246 have diameters that are larger than the entire rat tendons.<sup>13-15,20,21</sup> In the rat tendons studied  
247 here, the fiber diameter was 10-50  $\mu\text{m}$ . While this is not the first paper to identify the fiber in  
248 rat tendons,<sup>2</sup> this study provides evidence and a definition of a fiber that is based on  
249 characteristic features, confirmed by multiple imaging methods. Importantly, this definition is  
250 consistent with the developmental process of tendon. At later stages of development, as cells  
251 deposit more collagen, the tendon fiber is delineated as cells are pushed to the periphery.<sup>27</sup> To  
252 avoid confusion, the term fiber should be reserved to specifically identify this hierarchical  
253 structure of tendon, not to refer generally to a bundle of collagen.

254 As a point of clarification, the visualizations of cell density in confocal images and 3D  
255 rendering can be misleading because they depend on staining intensity. Because blood vessels  
256 and cells on peritenon that can also uptake the fluorophore, less fluorophore penetrated to the  
257 deeper planes for plantaris and Achilles tendons. In addition, the diameters of plantaris and  
258 Achilles tendons are larger than that of the tail tendon, and thus it contributes to the lack of  
259 fluorophore penetration. While it may appear that cell density in the tail tendon is higher than  
260 plantaris and Achilles tendons, this is strictly due to the penetration of fluorophore, and this is  
261 the cause for lack of cells visualized for Achilles tendon.

### 262 Comparative Anatomy Across Species

263 We considered if the fiber and fascicle size may be conserved across species. Tendons  
264 from larger animals such as horse and human have a subunit that falls within the fiber diameter  
265 and is outlined by cells and matches our diameter range, confirming that these tendons have  
266 fibers.<sup>17,46,47</sup> For example, the equine tendon fiber diameter is 1-20  $\mu\text{m}$ <sup>15,29</sup> and the human  
267 tendon primary fiber bundle diameter is 15  $\mu\text{m}$ <sup>21</sup>, which are similar to the fiber diameter 10-50  
268  $\mu\text{m}$  reported here. Thus, the definition of fiber can be applied across species, and this supports  
269 the idea that the organization of rat tendon is not a simple scale-down of larger animals, but  
270 that the fiber size is *conserved* across species. It is likely that mouse tendon only has fiber, not



271 fascicle, similar to rat tendon due to its small size. Tendon cell volumes<sup>48</sup> also appear to be  
272 consistent across species, which suggests that cells and fibers are the key units in growing  
273 aligned collagen region during the developmental process. It is unclear if the fascicle diameters  
274 are consistent across species, and it is possible that the number of fascicles or the size of  
275 fascicles may scale with the size of the animal.

276 The absence of fascicles in rat tendons should impact a researcher's animal model  
277 choice: studies that are focused on the structure and mechanics of the interfascicular matrix  
278 should exclude rat models. Interestingly, the age-related tendinopathy is mostly attributed to  
279 degeneration of the interfascicular matrix<sup>49,50</sup> and animals that have an interfascicular matrix,  
280 such as horses and human, develop naturally occurring age-related tendinopathy<sup>51</sup>, while rats  
281 do not appear to do so. While this difference may be due to the animal's life-span and activity  
282 level, studies of age-related tendinopathy should be aware that rats lack fascicles, and thus rats  
283 lack interfascicular matrix. Nonetheless, the rat tendon is a useful model system when studying  
284 tendon structure and mechanics because rat tendon is a simpler system, especially because the  
285 fiber structure and diameter is conserved across species.

#### 286 Comparative Anatomy of Rat Tendons

287 We demonstrated that the anatomy of the rat tail, plantaris, and Achilles tendons have  
288 distinct features that are related to their mechanical functions and each tendon can be used to  
289 answer specific research questions. The tail tendon's structure is simple and its mechanics are  
290 less variable, making it a suitable model to address fundamental research questions. However,  
291 the tail tendon is limited in that it bears low-stresses and lacks the muscle-tendon junction and  
292 insertion, cells on peritenon, and blood vessels. Thus, it may not be a suitable model for  
293 studying research questions related to high-stress tendons or healing process. The plantaris  
294 tendon, on the other hand, bears high-stress in vivo<sup>52</sup> and has a physiological structure  
295 including the muscle-tendon junction and blood vessels. In addition, a synergist ablation, an  
296 established rat model applied to study overuse-induced muscle hypertrophy<sup>53-55</sup>, may be a  
297 useful model to study tendinopathy. For example, the synergistic ablation model, where the  
298 Achilles is removed to overload the synergist plantaris tendon, leads to increased matrix  
299 production and thickened plantaris tendon after 4 weeks.<sup>3,4</sup> This suggests that this model may  
300 represent tendinopathic changes. The Achilles tendon also bears high-stress, and we observed  
301 that the structure of rat Achilles tendon is a fusion of three tendons, similar to that of human  
302 Achilles tendon.<sup>44,45</sup> Yet, due to its complex structure, the Achilles tendon is difficult to study at  
303 multiple length scales. Because of the fusion of three tendons, there is likely inter-tendon  
304 sliding<sup>56</sup> in addition to the micro-scale sliding. This likely contributes to the inhomogeneous

305 loading observed in vivo.<sup>56-58</sup> This structural complexity should be addressed when using the  
306 Achilles tendon as a model system.

307 While we and others have referred to the rat tail tendon as a 'fascicle', this terminology  
308 is discouraged. While there is a sheath surrounding rat tail tendons, which one could argue is  
309 interfascicular matrix and represents a fascicle. However, this sheath in the tail tendon and the  
310 interfascicular matrix of larger animals are distinctly different. The sheath in rat tail tendon can  
311 be easily peeled off with no resistance, while the fascicles of larger animals are tightly bound  
312 and must be cut to separate.<sup>16</sup> Thus, rat tail tendons should not be referred to as fascicles and  
313 should not be directly compared to fascicles in larger animals.

#### 314 Multi-scale Tendon Structure-Function and Damage Mechanics

315 Tendon structure and mechanics are related at multiple scales, and the fiber scale is  
316 likely to be an important contributor to tendon mechanics and damage. For example, tensile  
317 damage in the tail tendon is related to the changes in macro-scale mechanical parameters.<sup>32</sup>  
318 Furthermore, in both tail and plantaris tendons, micro-scale sliding, which represents shear  
319 between micro-scale structures, is related to both loading<sup>59</sup> and damage<sup>32</sup> mechanisms.  
320 Because these studies used photobleached lines and optical microscopy, which cannot  
321 distinguish between fibrils and fibers, both substructures are captured in the term 'micro-  
322 scale'.<sup>32,59</sup> Other studies have shown damage that is localized within fibers. Rat tail tendon that  
323 is loaded and then labeled with collagen hybridizing peptide (CHP), which binds to denatured  
324 collagen, showed a localization of CHP staining in a structure that had the same diameter as  
325 fiber observed here.<sup>60</sup> A similar observation was made in rat flexor carpi ulnaris tendon after  
326 mechanical loading, where CHP was localized in a structure with the same diameter as fiber.<sup>61</sup>  
327 In addition, the 3D reconstruction of SHG signals showed that a fiber space between fibers  
328 increased in loaded rat patellar tendon, suggesting that damage is related to structural changes  
329 in fiber.<sup>37</sup> Therefore, the fiber is likely to be a key substructure affected during tendon damage.

330 In summary, this study evaluated the hierarchical structure of rat tail, plantaris, and  
331 Achilles tendons at multiple length scales. Structurally-based definitions of fascicles and fibers  
332 were established using multiple imaging methods. We confirmed that rat tendons do not  
333 contain fascicles and fiber diameters were 10-50  $\mu\text{m}$  in all rat tendons studied. This fiber  
334 diameter is conserved across larger species. Specific recommendations were made for the  
335 strengths and limitations of each rat tendon as tendon research models

#### 336 **Acknowledgment**

337 This research was supported and made possible by National Institutes of Health grant No.  
338 R01EB002425, National Institute of General Medical Sciences grant No. P20 GM103446, the

339 National Science Foundation grant No. IIA-1301765, National Institutes of Health shared  
340 instrumentation grant No. S10 RR027273, and the State of Delaware. We thank the Bioimaging  
341 Center at the Delaware Biotechnology Institute and Dr. Jeff Caplan for supporting data  
342 acquisition. We thank Francis Karani for providing rats for tendon.

#### 343 **Authors Contribution**

344 A.H.L. and D.M.E. designed experiments. A.H.L. performed experiments and analyzed data.  
345 A.H.L. and D.M.E. wrote the manuscript.

346

#### 347 **References**

- 348 1. Bruneau, A., Champagne, N., Cousineau-Pelletier, P., Parent, G. & Langelier, E.  
349 Preparation of Rat Tail Tendons for Biomechanical and Mechanobiological Studies. *J. Vis.*  
350 *Exp.* e2176–e2176 (2010). doi:10.3791/2176
- 351 2. Rowe, R. W. The structure of rat tail tendon. *Connect. Tissue Res.* **14**, 9–20 (1985).
- 352 3. Schwartz, A. J. *et al.* p38 MAPK signaling in postnatal tendon growth and remodeling.  
353 *PLoS One* **10**, e0120044 (2015).
- 354 4. Gumucio, J. P. *et al.* Aging-associated exacerbation in fatty degeneration and infiltration  
355 after rotator cuff tear. *J. Shoulder Elb. Surg.* **23**, 99–108 (2014).
- 356 5. Lambertz, D., Pérot, C., Almeida-Silveira, M. I. & Goubel, F. Changes in stiffness induced  
357 by hindlimb suspension in rat Achilles tendon. *Eur. J. Appl. Physiol.* **81**, 252–257 (2000).
- 358 6. Eliasson, P., Andersson, T. & Aspenberg, P. Rat Achilles tendon healing: mechanical  
359 loading and gene expression. *J. Appl. Physiol.* **107**, 399–407 (2009).
- 360 7. Eliasson, P., Fahlgren, A., Pasternak, B. & Aspenberg, P. Unloaded rat Achilles tendons  
361 continue to grow, but lose viscoelasticity. *J. Appl. Physiol.* **103**, 459–463 (2007).
- 362 8. Maffulli, N. & Kader, D. Tendinopathy of Tendo Achillis. *Bone Joint J.* **84–B**, (2002).
- 363 9. van Sterkenburg, M. N., Kerkhoffs, G. M. M. J., Kleipool, R. P. & Niek van Dijk, C. The  
364 plantaris tendon and a potential role in mid-portion Achilles tendinopathy: an  
365 observational anatomical study. *J. Anat.* **218**, 336–341 (2011).
- 366 10. van Sterkenburg, M. N., Kerkhoffs, G. M. M. J. & van Dijk, C. N. Good outcome after  
367 stripping the plantaris tendon in patients with chronic mid-portion Achilles tendinopathy.  
368 *Knee Surgery, Sport. Traumatol. Arthrosc.* **19**, 1362–1366 (2011).
- 369 11. Lintz, F. *et al.* The role of Plantaris Longus in Achilles tendinopathy: A biomechanical  
370 study. *Foot Ankle Surg.* **17**, 252–255 (2011).
- 371 12. Nakagawa, Y., Totsuka, M., Sato, T., Fukuda, Y. & Hirota, K. Effect of disuse on the  
372 ultrastructure of the achilles tendon in rats. *Eur. J. Appl. Physiol. Occup. Physiol.* **59**, 239–  
373 242 (1989).
- 374 13. Kastelic, J., Galeski, A. & Baer, E. The multicomposite structure of tendon. *Connect. Tissue*  
375 *Res.* **6**, 11–23 (1978).
- 376 14. O'Brien, M. Structure and metabolism of tendons. *Scand. J. Med. Sci. Sports* **7**, 55–61

- 377 (1997).
- 378 15. Handsfield, G. G., Slane, L. C. & Screen, H. R. C. Nomenclature of the Tendon Hierarchy:  
379 An Overview of Inconsistent Terminology and a Proposed Size-Based Naming Scheme  
380 with Terminology for Multi-Muscle Tendons. *Journal of Biomechanics* (2016).  
381 doi:10.1016/j.jbiomech.2016.06.028
- 382 16. Thorpe, C. T. *et al.* The interfascicular matrix enables fascicle sliding and recovery in  
383 tendon, and behaves more elastically in energy storing tendons. *J. Mech. Behav. Biomed.*  
384 *Mater.* **52**, 85–94 (2015).
- 385 17. Benjamin, M., Kaiser, E. & Milz, S. Structure-function relationships in tendons: a review. *J.*  
386 *Anat.* **212**, 211–28 (2008).
- 387 18. Thorpe, C. T., Riley, G. P., Birch, H. L., Clegg, P. D. & Screen, H. R. C. Fascicles and the  
388 interfascicular matrix show adaptation for fatigue resistance in energy storing tendons.  
389 *Acta Biomater.* (2016). doi:10.1016/j.actbio.2016.06.012
- 390 19. Handsfield, G. G., Slane, L. C. & Screen, H. R. C. Nomenclature of the tendon hierarchy:  
391 An overview of inconsistent terminology and a proposed size-based naming scheme with  
392 terminology for multi-muscle tendons. *J. Biomech.* **49**, 3122–3124 (2016).
- 393 20. Wang, J. H.-C. Mechanobiology of tendon. *J. Biomech.* **39**, 1563–1582 (2006).
- 394 21. Kannus, P. Structure of the tendon connective tissue. *Scand. J. Med. Sci. Sports* **10**, 312–  
395 20 (2000).
- 396 22. Szczesny, S. E. & Elliott, D. M. Incorporating plasticity of the interfibrillar matrix in shear  
397 lag models is necessary to replicate the multiscale mechanics of tendon fascicles. *J. Mech.*  
398 *Behav. Biomed. Mater.* **40**, 325–38 (2014).
- 399 23. Bear, R. S. The Structure of Collagen Fibrils. *Adv. Protein Chem.* **7**, 69–160 (1952).
- 400 24. Benjamin, M., Kaiser, E. & Milz, S. Structure-function relationships in tendons: a review. *J.*  
401 *Anat.* **212**, 211–28 (2008).
- 402 25. McNeilly, C. M., Banes, A. J., Benjamin, M. & Ralphs, J. R. Tendon cells in vivo form a  
403 three dimensional network of cell processes linked by gap junctions. *J. Anat.* 593–600  
404 (1996). at <<http://www.ncbi.nlm.nih.gov/pubmed/8982835>>
- 405 26. Ralphs, J. R. *et al.* Regional differences in cell shape and gap junction expression in rat  
406 Achilles tendon: relation to fibrocartilage differentiation. *J. Anat.* 215–22 (1998). at  
407 <<http://www.ncbi.nlm.nih.gov/pubmed/9827637>>
- 408 27. Kalson, N. S. *et al.* A structure-based extracellular matrix expansion mechanism of fibrous  
409 tissue growth. *Elife* **4**, (2015).
- 410 28. Thorpe, C. T. *et al.* Helical sub-structures in energy-storing tendons provide a possible  
411 mechanism for efficient energy storage and return. *Acta Biomater.* **9**, 7948–56 (2013).
- 412 29. Thorpe, C. T., Udeze, C. P., Birch, H. L., Clegg, P. D. & Screen, H. R. C. Specialization of  
413 tendon mechanical properties results from interfascicular differences. *J. R. Soc. Interface*  
414 **9**, 3108–17 (2012).
- 415 30. Herod, T. W., Chambers, N. C. & Veres, S. P. Collagen fibrils in functionally distinct  
416 tendons have differing structural responses to tendon rupture and fatigue loading. *Acta*  
417 *Biomater.* (2016). doi:10.1016/j.actbio.2016.06.017

- 418 31. Thorpe, C. T. *et al.* Distribution of proteins within different compartments of tendon  
419 varies according to tendon type. *J. Anat.* **229**, 450–458 (2016).
- 420 32. Lee, A. H., Szczesny, S. E., Santare, M. H. & Elliott, D. M. Investigating mechanisms of  
421 tendon damage by measuring multi-scale recovery following tensile loading. *Acta*  
422 *Biomater.* **57**, 363–372 (2017).
- 423 33. Lee, A. H. & Elliott, D. M. Freezing does not alter multiscale tendon mechanics and  
424 damage mechanisms in tension. *Ann. N. Y. Acad. Sci.* **1409**, 85–94 (2017).
- 425 34. Chen, X., Nadiarynkh, O., Plotnikov, S. & Campagnola, P. J. Second harmonic generation  
426 microscopy for quantitative analysis of collagen fibrillar structure. *Nat. Protoc.* **7**, 654–  
427 669 (2012).
- 428 35. Pang, X. *et al.* Three dimensional microstructural network of elastin, collagen, and cells in  
429 Achilles tendons. *J. Orthop. Res.* (2017). doi:10.1002/jor.23240
- 430 36. Fung, D. T. *et al.* Early response to tendon fatigue damage accumulation in a novel in vivo  
431 model. *J. Biomech.* **43**, 274–9 (2010).
- 432 37. Fung, D. T. *et al.* Second harmonic generation imaging and Fourier transform spectral  
433 analysis reveal damage in fatigue-loaded tendons. *Ann. Biomed. Eng.* **38**, 1741–51 (2010).
- 434 38. Simpson, S. L., Hertzog, M. S. & Barja, R. H. The plantaris tendon graft: An ultrasound  
435 study. *J. Hand Surg. Am.* **16**, 708–711 (1991).
- 436 39. Freeman, A. J., Jacobson, N. A. & Fogg, Q. A. Anatomical variations of the plantaris  
437 muscle and a potential role in patellofemoral pain syndrome. *Clin. Anat.* **21**, 178–181  
438 (2008).
- 439 40. Harvey, F. J., Chu, G. & Harvey, P. M. Surgical availability of the plantaris tendon. *J. Hand*  
440 *Surg. Am.* **8**, 243–7 (1983).
- 441 41. Nayak, S. R. *et al.* Anatomy of plantaris muscle: a study in adult Indians. *Clin. Ter.* **161**,  
442 249–52 (2010).
- 443 42. Saxena, A. & Bareither, D. Magnetic resonance and cadaveric findings of the incidence of  
444 plantaris tendon. *Foot ankle Int.* **21**, 570–2 (2000).
- 445 43. dos Santos, M. A., Bertelli, J. A., Kechele, P. R. & Duarte, H. Anatomical study of the  
446 plantaris tendon: reliability as a tendo-osseous graft. *Surg. Radiol. Anat.* **31**, 59–61 (2009).
- 447 44. Bojsen-Møller, J. & Magnusson, S. P. Heterogeneous Loading of the Human Achilles  
448 Tendon In Vivo. *Exerc. Sport Sci. Rev.* **43**, 190–197 (2015).
- 449 45. Szaro, P., Witkowski, G., Śmigielski, R., Krajewski, P. & Cizek, B. Fascicles of the adult  
450 human Achilles tendon – An anatomical study. *Ann. Anat. - Anat. Anzeiger* **191**, 586–593  
451 (2009).
- 452 46. Ali, O., Comerford, E., Clegg, P. & Canty-Laird, E. Variations during ageing in the three-  
453 dimensional anatomical arrangement of fascicles within the equine superficial digital  
454 flexor tendon. *Eur. Cells Mater.* **35**, 87–102 (2018).
- 455 47. Franchi, M., Trirè, A., Quaranta, M., Orsini, E. & Ottani, V. Collagen Structure of Tendon  
456 Relates to Function. *Sci. World J.* **7**, 404–420 (2007).
- 457 48. Savage, V. M. *et al.* Scaling of number, size, and metabolic rate of cells with body size in  
458 mammals. *Proc. Natl. Acad. Sci. U. S. A.* **104**, 4718–23 (2007).

- 459 49. Godinho, M. S. C., Thorpe, C. T., Greenwald, S. E. & Screen, H. R. C. Elastin is Localised to  
460 the Interfascicular Matrix of Energy Storing Tendons and Becomes Increasingly  
461 Disorganised With Ageing. *Sci. Rep.* **7**, 9713 (2017).
- 462 50. Thorpe, C. T., Udeze, C. P., Birch, H. L., Clegg, P. D. & Screen, H. R. C. Capacity for sliding  
463 between tendon fascicles decreases with ageing in injury prone equine tendons: a  
464 possible mechanism for age-related tendinopathy? *Eur. Cell. Mater.* **25**, 48–60 (2013).
- 465 51. Patterson-Kane, J. C., Becker, D. L. & Rich, T. The Pathogenesis of Tendon Microdamage  
466 in Athletes: the Horse as a Natural Model for Basic Cellular Research. *J. Comp. Pathol.*  
467 **147**, 227–247 (2012).
- 468 52. Rijkelijhuizen, J. M., Baan, G. C., de Haan, A., de Ruyter, C. J. & Huijijng, P. A.  
469 Extramuscular myofascial force transmission for in situ rat medial gastrocnemius and  
470 plantaris muscles in progressive stages of dissection. *J. Exp. Biol.* **208**, 129–40 (2005).
- 471 53. Goodman, C. A. *et al.* Novel insights into the regulation of skeletal muscle protein  
472 synthesis as revealed by a new nonradioactive *in vivo* technique. *FASEB J.* **25**, 1028–1039  
473 (2011).
- 474 54. Kirby, T. J., McCarthy, J. J., Peterson, C. A. & Fry, C. S. in *Methods in molecular biology*  
475 (*Clifton, N.J.*) **1460**, 43–52 (2016).
- 476 55. Terena, S. M. L., Fernandes, K. P. S., Bussadori, S. K., Deana, A. M. & Mesquita-Ferrari, R.  
477 A. Systematic review of the synergist muscle ablation model for compensatory  
478 hypertrophy. *Rev. Assoc. Med. Bras.* **63**, 164–172 (2017).
- 479 56. Handsfield, G. G. *et al.* A 3D model of the Achilles tendon to determine the mechanisms  
480 underlying nonuniform tendon displacements. *J. Biomech.* (2017).  
481 doi:10.1152/jappphysiol.01249.2013
- 482 57. Slane, L. C. & Thelen, D. G. Non-uniform displacements within the Achilles tendon  
483 observed during passive and eccentric loading. *J. Biomech.* **47**, 2831–2835 (2014).
- 484 58. Franz, J. R., Slane, L. C., Rasske, K. & Thelen, D. G. Non-uniform in vivo deformations of  
485 the human Achilles tendon during walking. *Gait Posture* **41**, 192–197 (2015).
- 486 59. Szczesny, S. E. & Elliott, D. M. Interfibrillar shear stress is the loading mechanism of  
487 collagen fibrils in tendon. *Acta Biomater.* **10**, 2582–90 (2014).
- 488 60. Zitnay, J. L. *et al.* Molecular level detection and localization of mechanical damage in  
489 collagen enabled by collagen hybridizing peptides. *Nat. Commun.* **8**, 14913 (2017).
- 490 61. Szczesny, S. E., Aeppli, C., David, A. & Mauck, R. L. Fatigue loading of tendon results in  
491 collagen kinking and denaturation but does not change local tissue mechanics. *J.*  
492 *Biomech.* (2018). doi:10.1016/J.JBIOMECH.2018.02.014  
493

**Achilles +  
Plantaris Tendon**

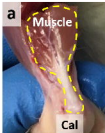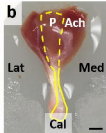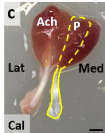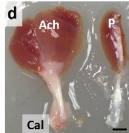

**Achilles Tendon**

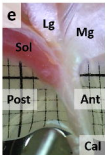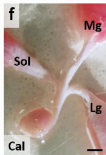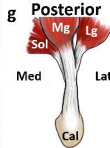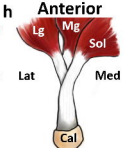

Long: PicroSirus Red

Tail

Plantaris

Achilles

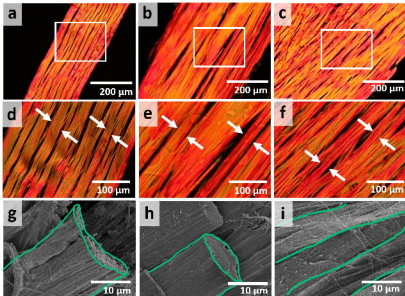



Transverse: H&E

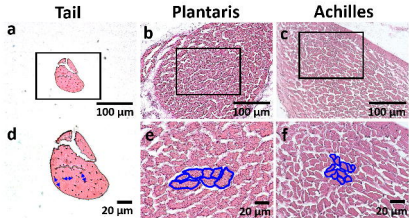

Tail

Plantaris

Achilles

Deep

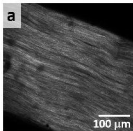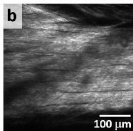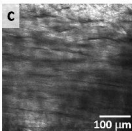

Superficial

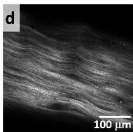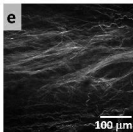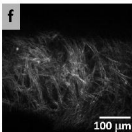

Deep/Cell

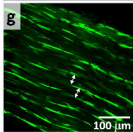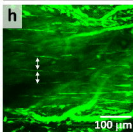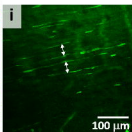

## Tail

## Plantaris

## Achilles

3D

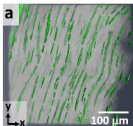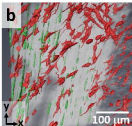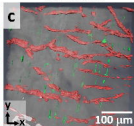

Trans

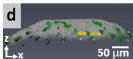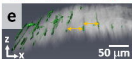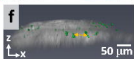

Oblique

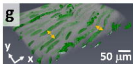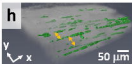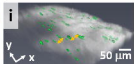

## Rat Tail Tendon

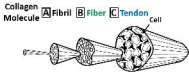

1.5 nm 50–500 nm 10–50  $\mu\text{m}$  100–400  $\mu\text{m}$

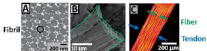

## Rat Plantaris and Achilles Tendons

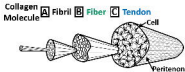

1.5 nm 50–500 nm 10–50  $\mu\text{m}$  0.5–3 mm

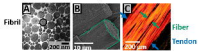

Source: https://www.biorxiv.org/content/10.1101/396309v1.full.pdf
